# Supplementary material for: Concurrent determination of U, Np, Pu, Am, and Cm in clay systems at ultra-trace levels with accelerator mass spectrometry
Source: Royal Society of Chemistry journal article supplement (doi:10.1039/d2ja00107a), 2022-01-01
Supplement: d2ja00107a1.pdf [file d2ja00107a1.pdf]

## Supplementary information

**Table S1** OPA<sup>10</sup> and COx<sup>11</sup> pore water compositions and corresponding pH, and  $E_h$  at 25 °C used for the solubility and speciation calculations.

| Clay rock                       | OPA                   | COx                   |
|---------------------------------|-----------------------|-----------------------|
| $\vartheta$ / °C                | 25                    | 25                    |
| pH                              | 7.5                   | 7.2                   |
| $E_h$ / mV                      | -185                  | -200                  |
| Element concentration / (mol/L) |                       |                       |
| Na                              | $1.64 \times 10^{-1}$ | $5.24 \times 10^{-2}$ |
| K                               | $2.60 \times 10^{-3}$ | $1.10 \times 10^{-3}$ |
| Mg                              | $9.60 \times 10^{-3}$ | $5.10 \times 10^{-3}$ |
| Ca                              | $1.24 \times 10^{-2}$ | $6.30 \times 10^{-3}$ |
| Sr                              | $2.00 \times 10^{-4}$ | $1.00 \times 10^{-4}$ |
| Fe                              | $5.10 \times 10^{-2}$ | –                     |
| Cl                              | $1.60 \times 10^{-1}$ | $4.05 \times 10^{-2}$ |
| F                               | $1.50 \times 10^{-4}$ | –                     |
| S                               | $2.47 \times 10^{-2}$ | $1.58 \times 10^{-2}$ |
| C                               | $1.20 \times 10^{-3}$ | $3.10 \times 10^{-3}$ |
| Si                              | $2.00 \times 10^{-4}$ | $4.00 \times 10^{-4}$ |

**Table S2** Calculated dominant solid phases of U, Np, Pu, Am, and Cm and their respective dominant aquatic species in OPA and COx pore water in equilibrium.

| Actinide | Solid phase                                                | Dominant aquatic species<br>(COx %; OPA %)                                                                                                                  |
|----------|------------------------------------------------------------|-------------------------------------------------------------------------------------------------------------------------------------------------------------|
| U        | UO <sub>2</sub> ·2H <sub>2</sub> O (am)                    | Ca <sub>2</sub> UO <sub>2</sub> (CO <sub>3</sub> ) <sub>3</sub> (aq) (67; 68)<br>[CaUO <sub>2</sub> (CO <sub>3</sub> ) <sub>3</sub> ] <sup>2-</sup> (31; 8) |
| Np       | NpO <sub>2</sub> ·2H <sub>2</sub> O (am)                   | Np(OH) <sub>4</sub> (aq) (83; 92)<br>[Np(CO <sub>3</sub> )(OH) <sub>3</sub> ] <sup>-</sup> (14; 6)                                                          |
| Pu       | PuO <sub>2</sub> ·2H <sub>2</sub> O (am)                   | [Pu(CO <sub>3</sub> )] <sup>+</sup> (49; 35)<br>[Pu(SO <sub>4</sub> )] <sup>+</sup> (28; 30)                                                                |
| Am       | NaAm(CO <sub>3</sub> ) <sub>2</sub> ·5H <sub>2</sub> O (s) | [Am(CO <sub>3</sub> )] <sup>+</sup> (53; 41)<br>[AmOSi(OH) <sub>3</sub> ] <sup>2+</sup> (30; 37)                                                            |
| Cm       | NaCm(CO <sub>3</sub> ) <sub>2</sub> ·5H <sub>2</sub> O(s)  | [Cm(CO <sub>3</sub> )] <sup>+</sup> (52; 40)<br>[CmOSi(OH) <sub>3</sub> ] <sup>2+</sup> (31; 39)                                                            |
